# Supplementary material for: Contrasting roles of SPARC-related granuloma in bacterial containment and in the induction of anti–Salmonella typhimurium immunity
Source: PubMed Central journal article supplement — J Exp Med. 2008 Mar 17;205(3):657–67. doi: 10.1084/jem.20071734 (PMC2275387; doi:10.1084/jem.20071734), 2008-03-17
Supplement: jem.20071734_5.pdf [file jem.20071734_5.pdf]

Rotta et al., <http://www.jem.org/cgi/content/full/jem.20071734/DC1>

## SUPPLEMENTAL MATERIALS AND METHODS

**Masson trichrome staining.** Tissues were embedded in OCT, snap frozen in liquid nitrogen, and sectioned at 7  $\mu\text{m}$ . Sections were subsequently fixed in acetone for 10 min and rinsed in PBS.

Masson trichrome staining was performed according to the manufacturer's instruction (Sigma-Aldrich).

**Dendritic cells migration.** Mice were anesthetized i.p. with Avertin 2.5% and shaved in four sites of the dorsal skin, which were drained either by the inguinal or brachial LNs.  $10^5$  and  $10^3$  CFUs of bacteria (WT *Salmonella* SL1344) were diluted to a final volume of 10  $\mu\text{l}$  PBS and injected i.d. using a Hamilton syringe (Thermo Fisher Scientific).  $10^7$  FITC-conjugated latex particles of 1  $\mu\text{m}$  in diameter (Polysciences) were injected as tracers in the presence or absence of bacteria. Migration of IA/IE<sup>+</sup> or CD11c<sup>+</sup> cells carrying latex to DLNs was assessed 3 d after treatment. At the indicated time, mice were killed, DLNs were collected and teased, and cells were released by treatment with 0.25% collagenase at 37°C for 25 min (Collagenase D; Roche). Cells were stained for IA/IE or CD11c expression. For quantification, the entire population of DLN cells was acquired by cytofluorometry and absolute numbers of CD11c<sup>+</sup> or IA/IE<sup>+</sup> cells carrying latex beads were determined per LN.
